# Supplementary material for: Self-assembly of linear diblock copolymers in selective solvents: from single micelles to particles with tri-continuous inner structures
Source: Royal Society of Chemistry journal article supplement (doi:10.1039/d0sm00402b), 2020-01-01
Supplement: d0sm00402b1.pdf [file d0sm00402b1.pdf]

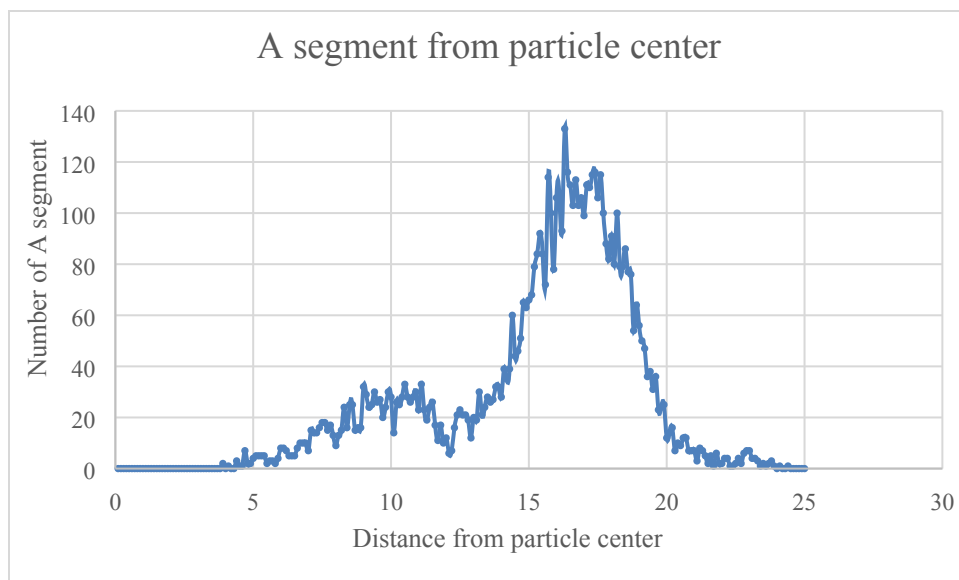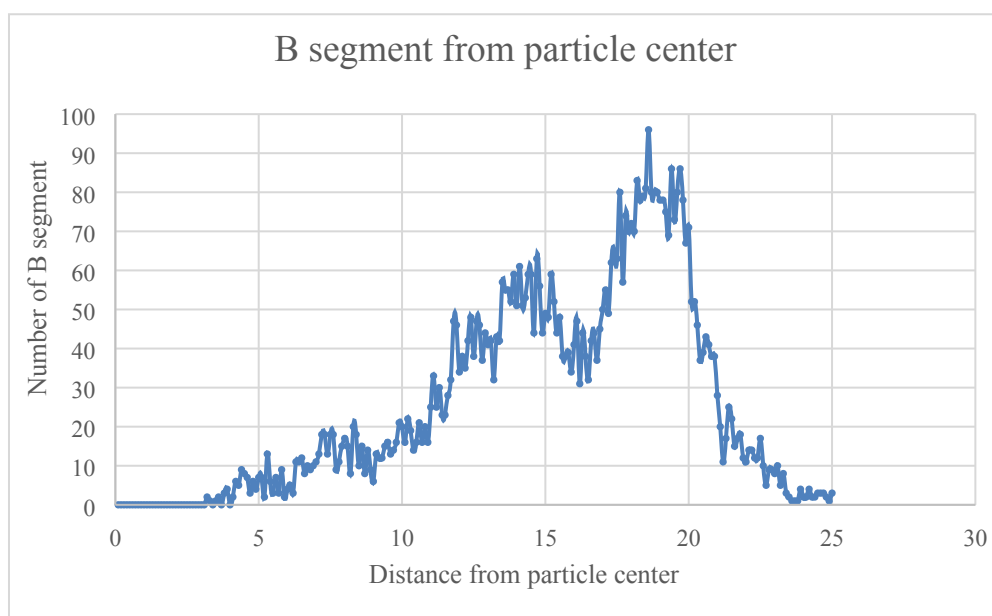

Figure S1 Radial distributions of A, and B segment of  $A_{12}$ -b- $B_7$  as a function of the distance from the aggregate's center of mass for onion structure (6416, 32.0M) reported in Figure 3.

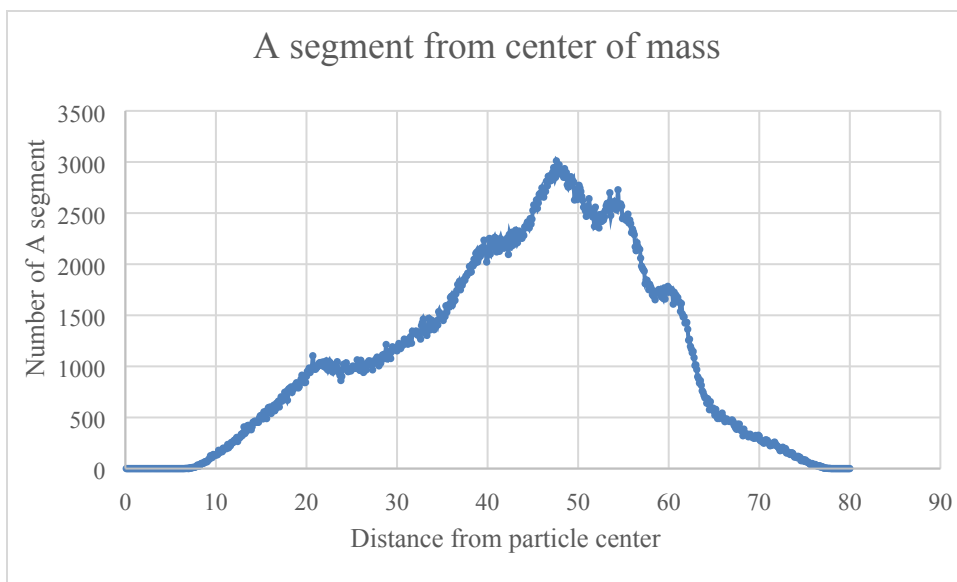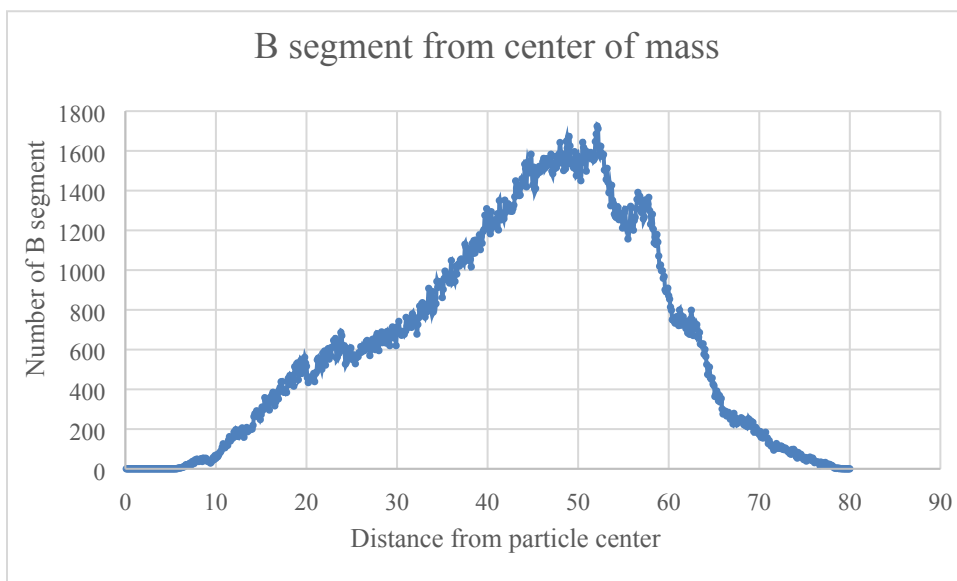

Figure S2 Radial distributions of A, and B segment of  $A_{12}$ -b- $B_7$  as a function of the distance from the aggregate's center of mass for double-wall ring structure (72477, 32M) reported in Figure 3.

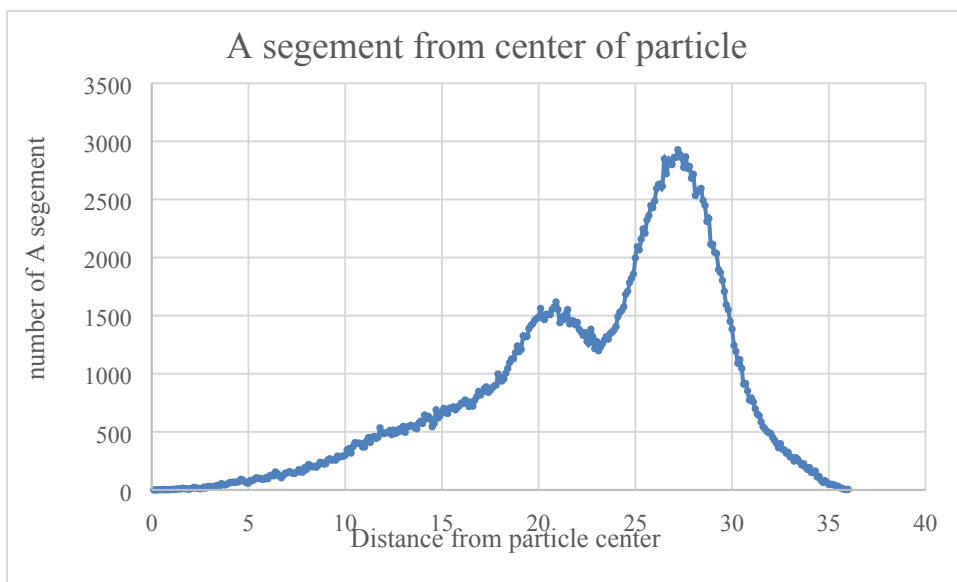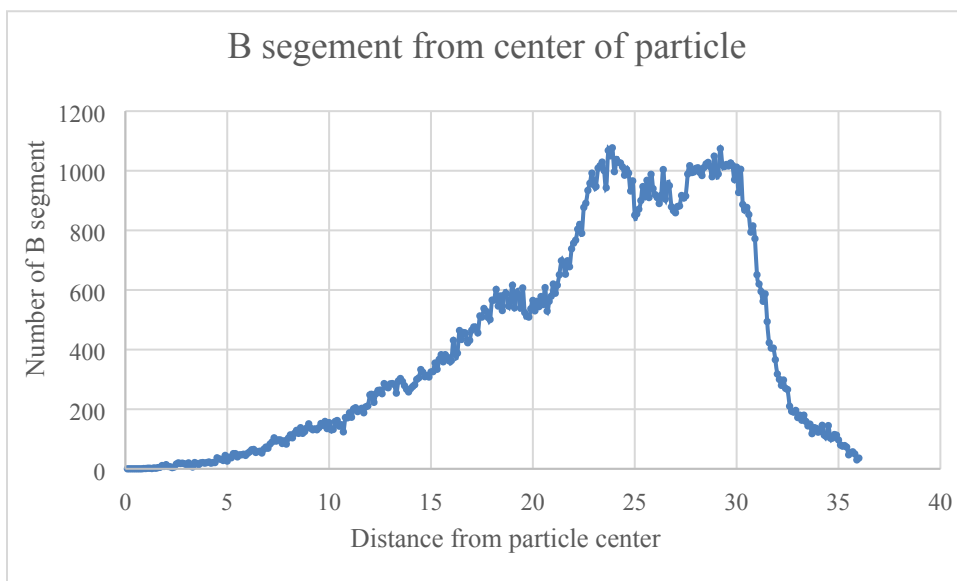

Figure S3 Radial distributions of A, and B segment of  $A_{12}$ -b- $B_6$  as a function of the distance from the aggregate's center of mass for last tri-continuous structure (16360, 9.75M) reported in Figure 4.

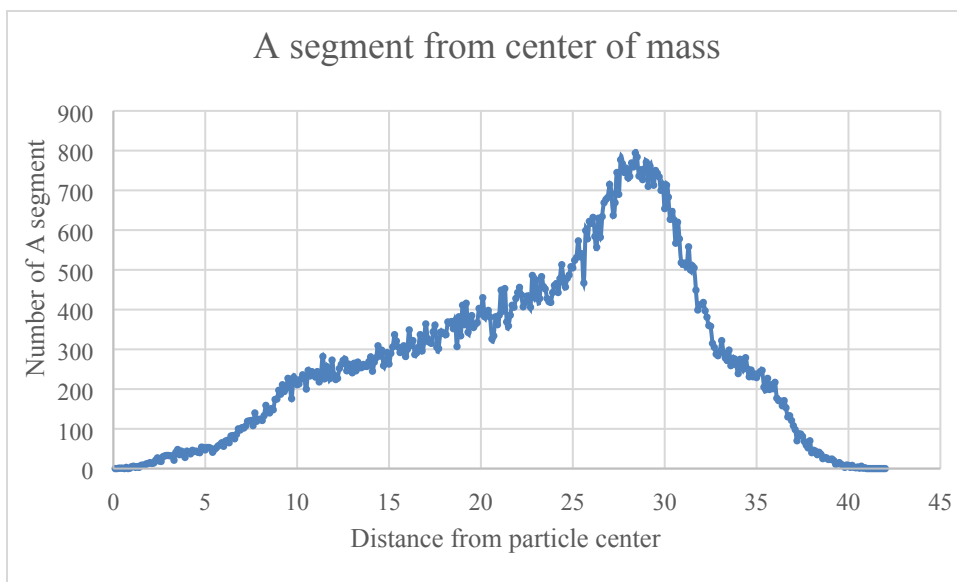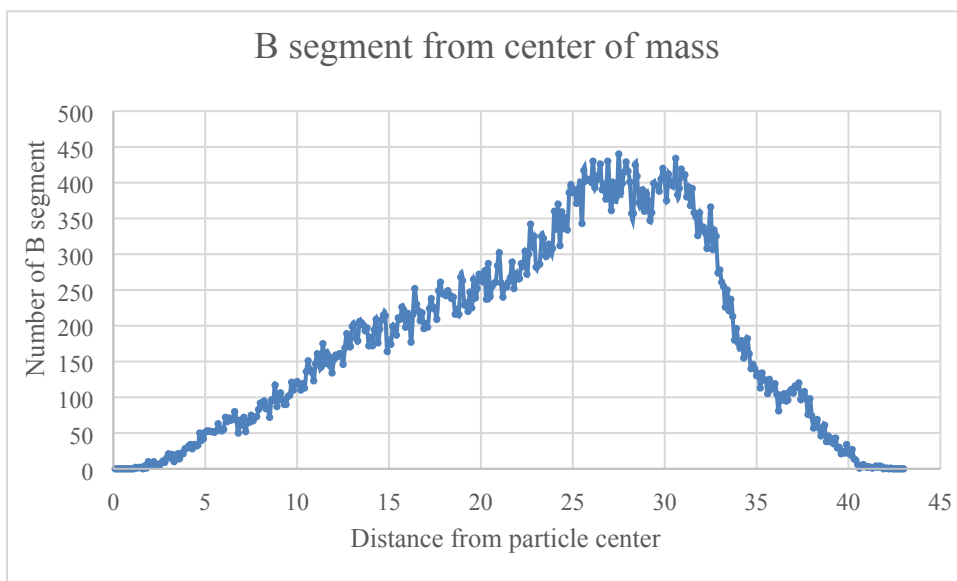

Figure S4 Radial distributions of A, and B segment of  $A_{12}$ -b- $B_8$  as a function of the distance from the aggregate's center of mass for disk-like structure (10798, 8.5M) reported in Figure 5.
